# Supplementary material for: First report on the epidemiology of Buxtonella sulcata in bovines in Pakistan
Source: Research Square preprint supplement (doi:10.21203/rs.3.rs-1651920/v1), 2022-05-16
Supplement: Supplementary file 1 [file 4fc75ebdeb02e49927a5234b.docx]

- Pakistan is blessed with a large proportion of livestock population contributing a major portion in total and agricultural GDP
- *Buxtonella (B.) sulcata* is an important GIT protozoan in bovines and morphologically similar to *Balantidium (B.) coli*
- To resolve the issue of misdiagnosis with *B. coli*, the current study indicated the occurrence of *B. sulcata* in bovines through phylogenetic analysis
